# Supplementary material for: The Effect of Temperature on the Mechanical Properties of Alginate Gels in Water/Alcohol Solutions
Source: MDPI journal article supplement (doi:10.3390/gels9070579), 2023-07-16
Supplement: s1 [file s1]

## Supplementary material

# The effect of temperature on the mechanical properties of alginate gels in water/alcohol solutions

H. Malektaj, A.D. Drozdov, J. deClaville Christiansen

Department of Materials and Production

Aalborg University

Fibigerstraede 16, Aalborg 9220, Denmark

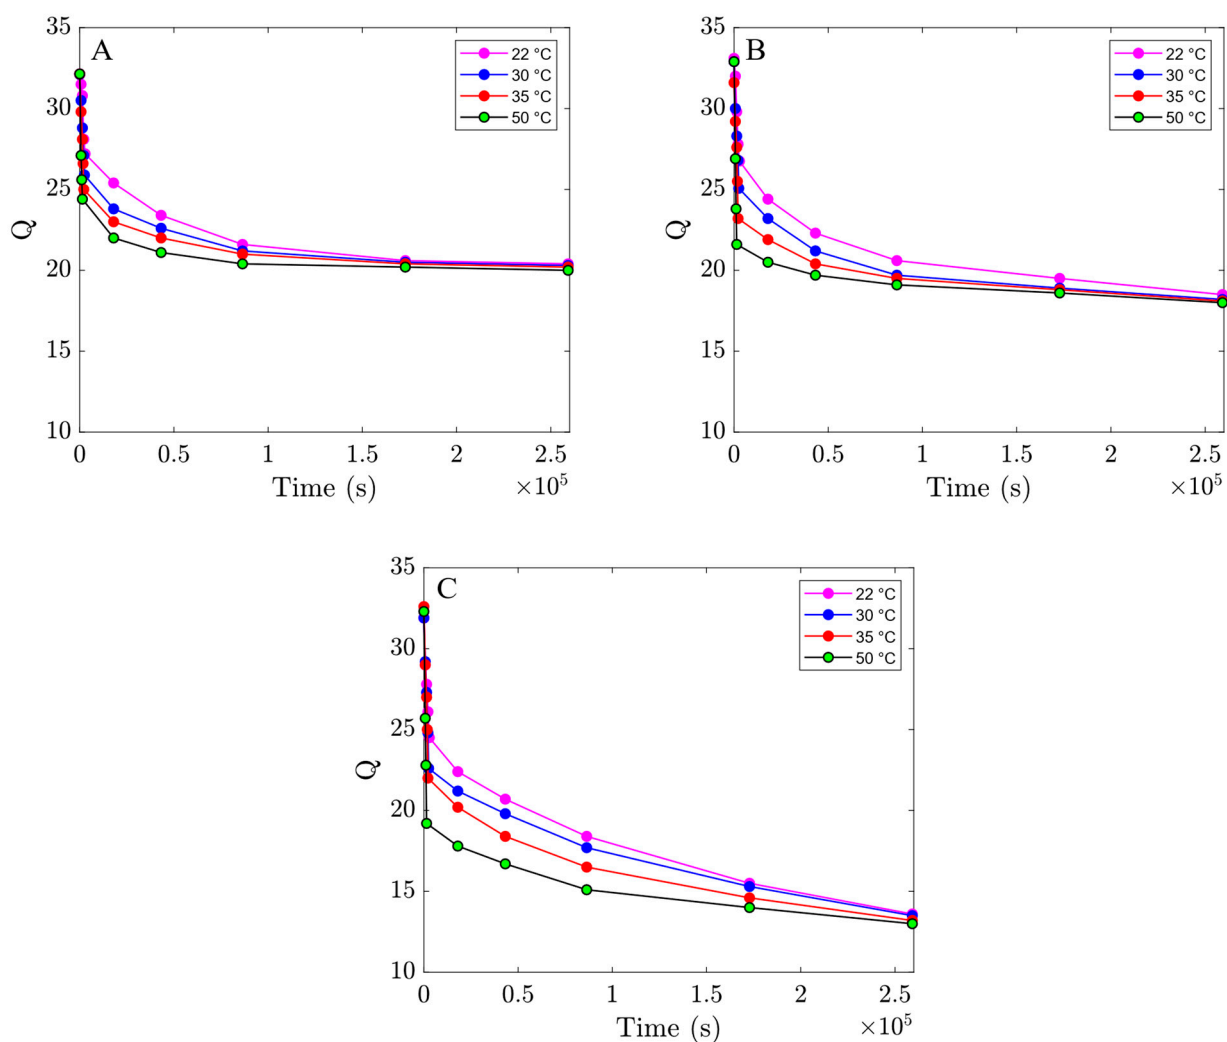

Figure S1: Degree of swelling  $Q$  versus time  $t$  for organohydrogels in pure (A) methanol, (B) ethanol and (C) 2-propanol at various temperatures  $T$ .
